# Supplementary material for: Targeting Alpha Toxin and ClfA with a Multimechanistic Monoclonal-Antibody-Based Approach for Prophylaxis of Serious Staphylococcus aureus Disease
Source: PubMed Central journal article supplement (PMC4937210; doi:10.1128/mbio.00528-16), 2016-06-28
Supplement: mbo003162872sf1.pdf [file mbo003162872sf1.pdf]

FIG. S1

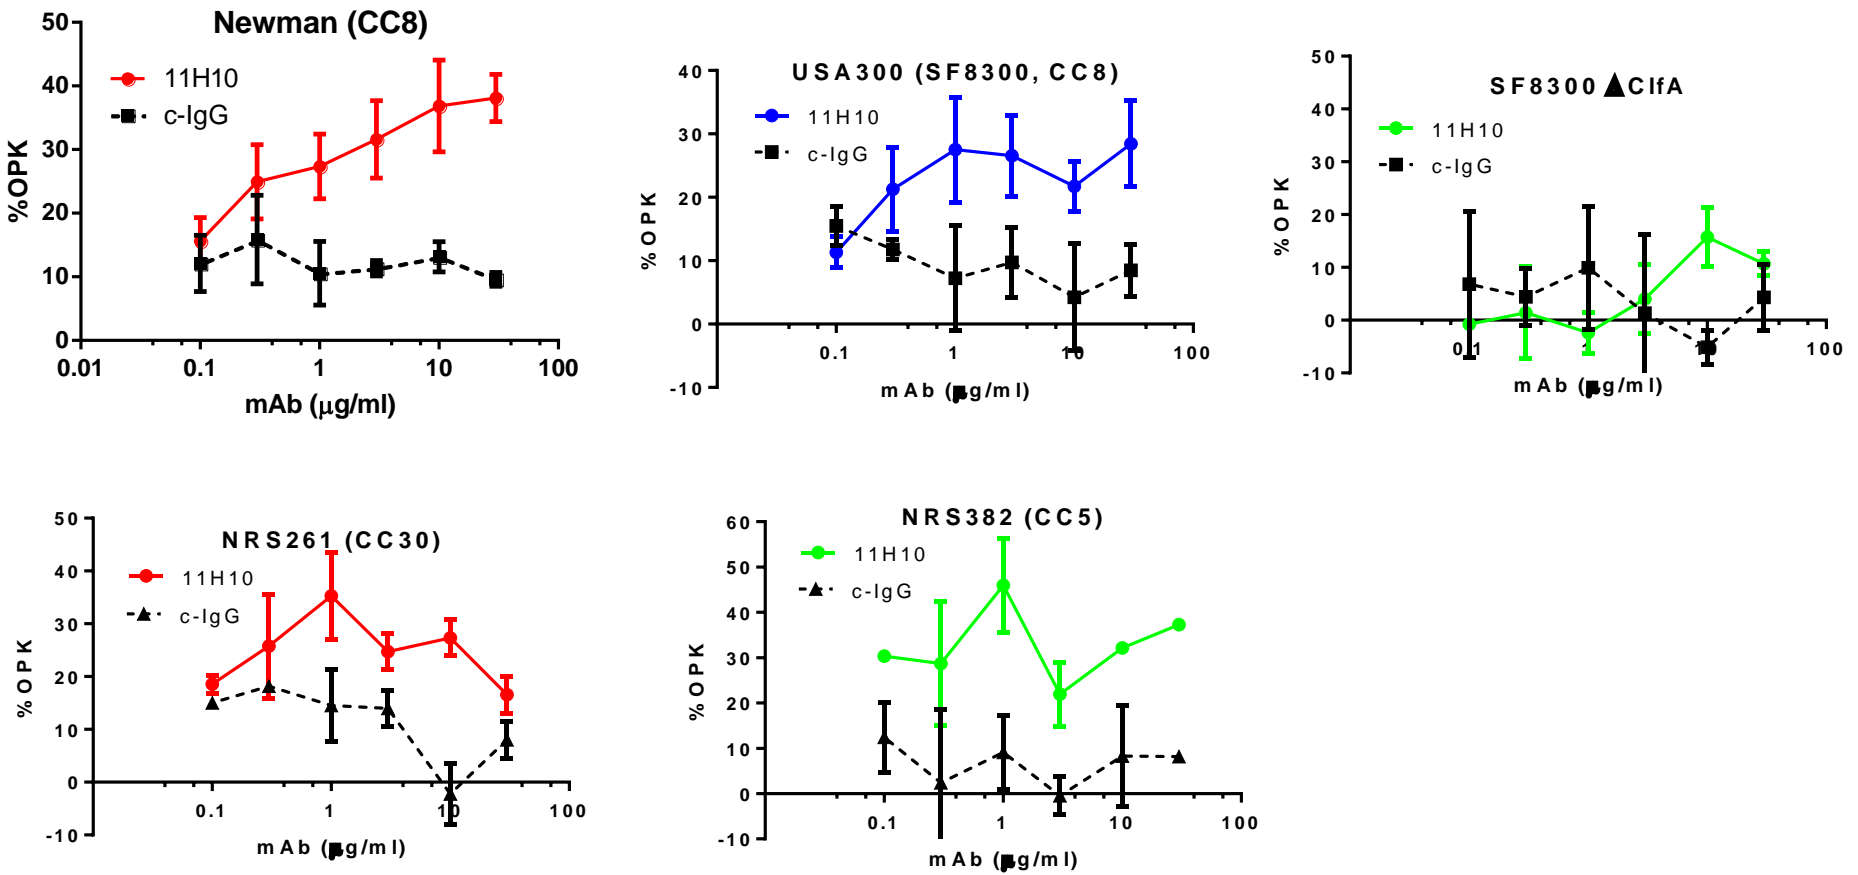

**FIG S1** 11H10 mediates OPK against multiple clinical isolates. Six different *S. aureus* clinical isolates were grown overnight in TSB medium. Bacteria were opsonized with serial dilutions of 11H10 or c-IgG as a negative control. Differentiated human monocytic cells (HL-60) were added at a 10:1 (HL60:bacteria) ratio with human sera at a dilution 1:100 and OPK activity measured. The graphs represent OPK killing as a mean of three separate experiments  $\pm$  standard deviations.
