# Supplementary material for: Targeting Alpha Toxin and ClfA with a Multimechanistic Monoclonal-Antibody-Based Approach for Prophylaxis of Serious Staphylococcus aureus Disease
Source: PubMed Central journal article supplement (PMC4937210; doi:10.1128/mbio.00528-16), 2016-06-28
Supplement: mbo003162872sf2.pdf [file mbo003162872sf2.pdf]

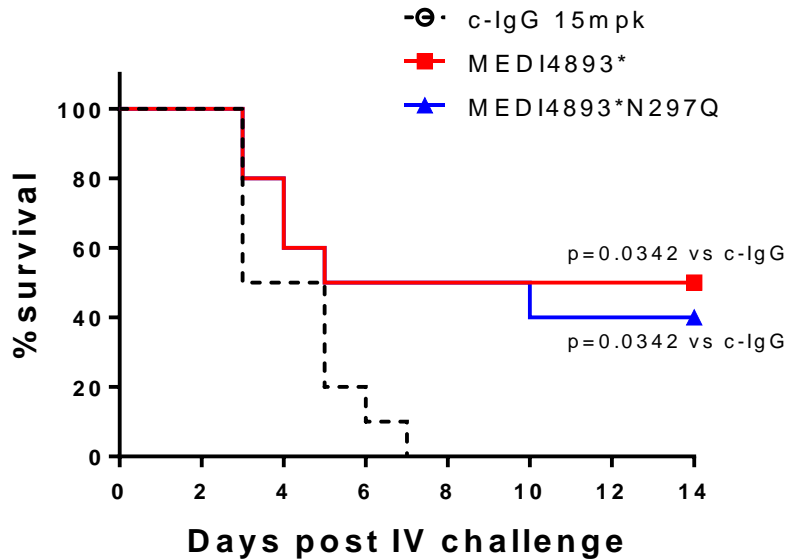

**FIG S2** Fc function is not required for MEDI4893\* protection in lethal bacteremia. Balb/c mice (n=10) were passively immunized IP with MEDI4893\* (■), MEDI4893\*<sub>N297Q</sub> (▲) or c-IgG (○) at 15mpk, and infected 24h later with SF8300 (5e7 CFU). Survival was monitored for 14 days. Statistical difference for survival between MEDI4893\*, and MEDI4893\*<sub>N297Q</sub> versus c-IgG was analyzed with a Log Rank (Mantel Cox) test. Values were considered statistically different if p<0.05. Data are representative of two independent experiments.
