# Supplementary material for: Targeting Alpha Toxin and ClfA with a Multimechanistic Monoclonal-Antibody-Based Approach for Prophylaxis of Serious Staphylococcus aureus Disease
Source: PubMed Central journal article supplement (PMC4937210; doi:10.1128/mbio.00528-16), 2016-06-28
Supplement: mbo003162872sf4.pdf [file mbo003162872sf4.pdf]

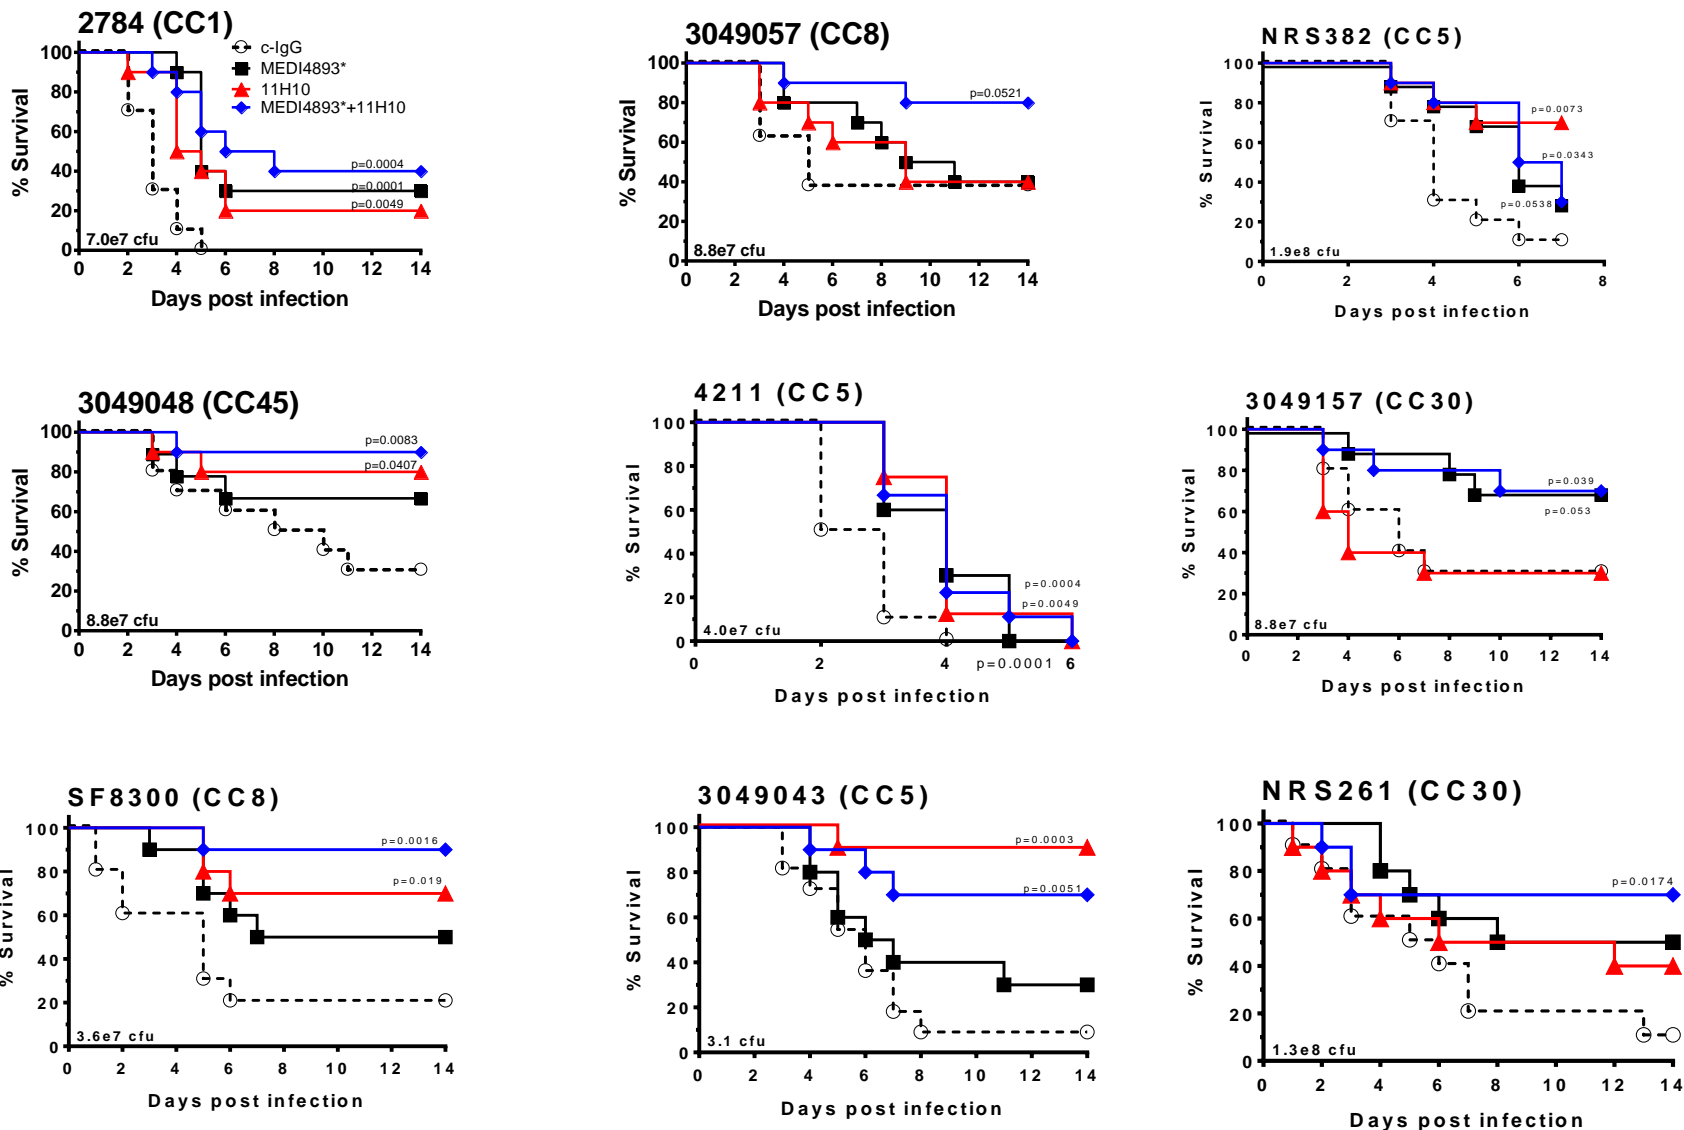

**FIG S4** Anti-AT and anti-ClfA combination provided broad strain coverage. Balb/c mice (n=10) were immunized IP with 15mpk of MEDI4893\* (■), or 11H10 (▲), MEDI4893\*+11H10 (7.5mpk each) (◆) or c-IgG (15mpk) (○). Twenty-four hours later, animals were infected IV in the tail vein with LD<sub>50</sub> (as indicated on each graph) of one of nine different *S. aureus* isolates from diverse clonal complexes (CC) and survival monitored for 2 weeks. Statistical analysis was assessed with a Log Rank (Mantel-Cox) test, and considered statistically different versus c-IgG if p<0.05. Data are representative of at least three independent experiments.
