# Supplementary material for: Targeting Alpha Toxin and ClfA with a Multimechanistic Monoclonal-Antibody-Based Approach for Prophylaxis of Serious Staphylococcus aureus Disease
Source: PubMed Central journal article supplement (PMC4937210; doi:10.1128/mbio.00528-16), 2016-06-28
Supplement: mbo003162872st2.pdf [file mbo003162872st2.pdf]

**Table S2:** Primers used for in-frame gene deletion of *clfA* using the pKOR1 system.

| <b>Primer ID</b> | <b>5' → 3' nucleotide sequence</b>                   |
|------------------|------------------------------------------------------|
| <b>clfA-X1</b>   | ggaggggcaaagatgc                                     |
| <b>clfA-X2</b>   | CGTATTTGCTTCATCTTCAGAACCACCTACAAGCACTGAAGCCAC        |
| <b>clfA-X3</b>   | GTGGCTTCAGTGCTTGTAGGTGGTTCTGAAGATGAAGCAAATACG        |
| <b>clfA-X4</b>   | GCTTCAGTGTCAGATTTTAATTGAGC                           |
| <b>clfA-X5</b>   | GGGG ACAAGTTTGTACAAAAAAGCAGGCT ctttgctcaagtgaccag    |
| <b>clfA-X6</b>   | GGGG ACCACTTTGTACAAGAAAGCTGGGT GTCGCACTTTAATTGCTCCTC |
| <b>clfA-S1</b>   | gtttgcaatcaaatcgtacgttgc                             |
| <b>clfA-S2</b>   | GAAACCACTGCACTCGCAC                                  |
